# Supplementary material for: Rationale for COVID-19 Treatment by Nebulized Interferon-β-1b–Literature Review and Personal Preliminary Experience
Source: PubMed Central journal article supplement (PMC7734101; doi:10.3389/fphar.2020.592543), 2020-11-30
Supplement: datasheet1.pdf [file datasheet1.pdf]

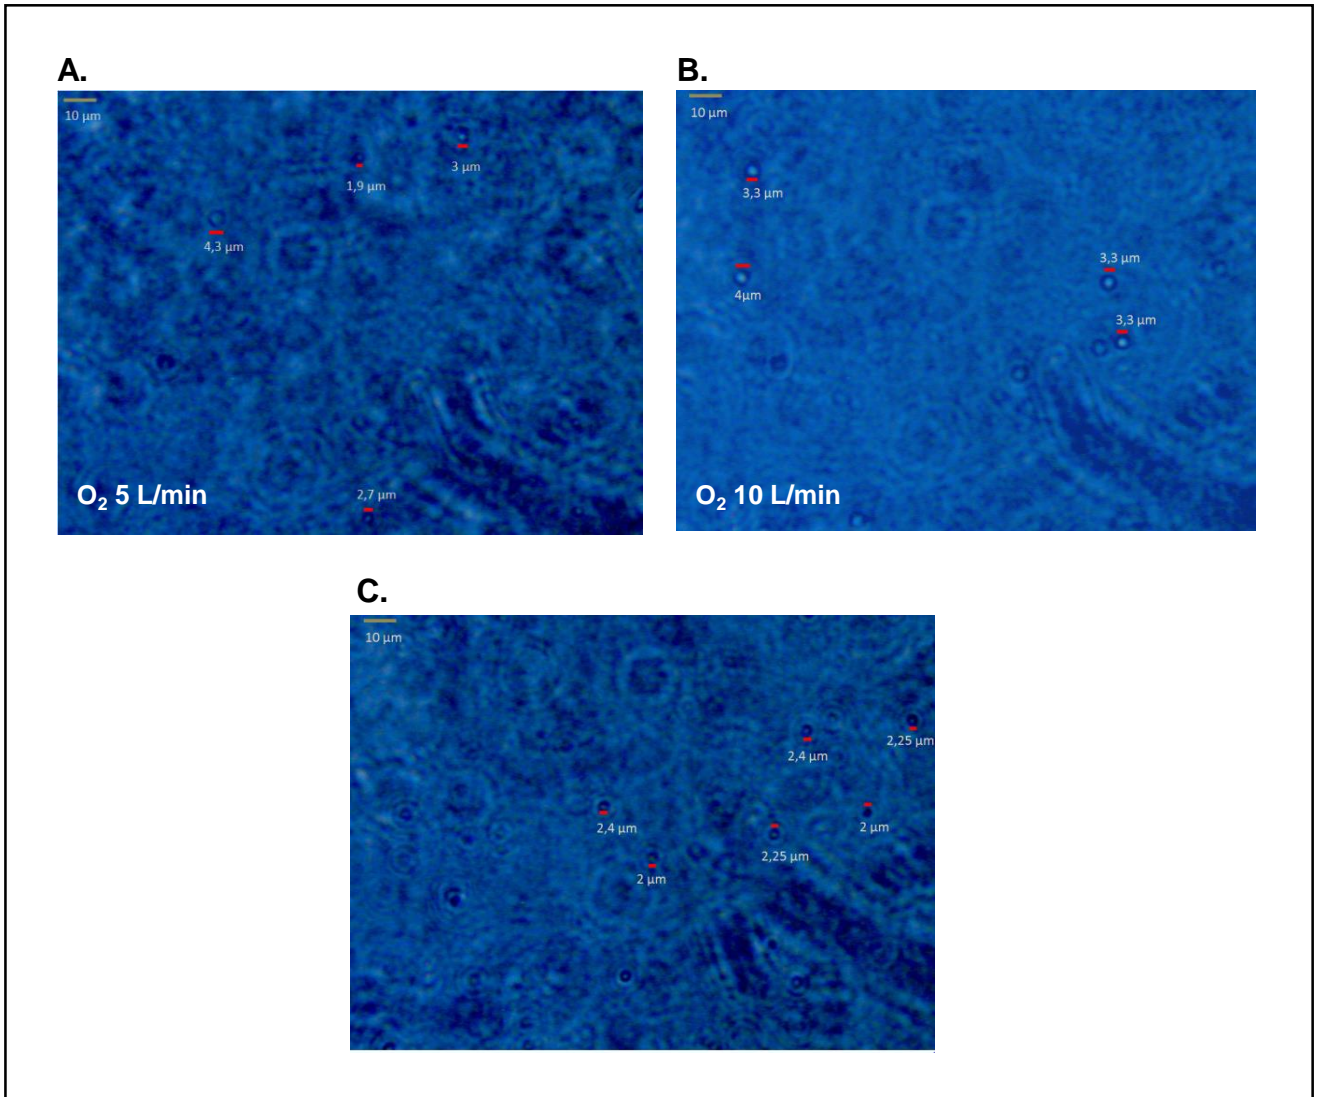

**Supplemental Figure 1 : Microscopic observation of fine particles after IFN- $\beta$ -1b nebulization.**

IFN- $\beta$ -1b (Extavia® Novartis) was reconstituted in 2 mL WFI and extemporaneously aerosolized with jet nebulizer MICROMIST® Nebulizer with in-Line Neb Tee® with valve from HUDSON RCI® (reference: 41745) for 1 min. **A.** and **B.** Particles of IFN- $\beta$ -1b aerosol generated without respirator with a fixed flow of oxygen in the pneumatic nebulizer chamber. **C.** Particles of IFN- $\beta$ -1b aerosol generated with a respirator using a pneumatic nebulizer (Dräger Evita XL ventilator). Particle diameter is shown in red. Magnification x40. n=3
